# Supplementary material for: Orbital forcing of terrestrial hydrology, weathering and carbon sequestration during the Palaeocene-Eocene Thermal Maximum
Source: Copernicus journal article supplement (doi:10.5194/cp-2017-131), 2017-11-16
Supplement: Supplementary file 1 [file Dunkley Jones CP SI.xlsx]

## Sheet: Data
	XRF data and Carbonate / Detrital MARs													Bulk Carbonate Stable Isotope Data					Organic Carbon contents and TOC MAR					Measured CaCO3 content
	Height (m)	Age (Ma)	CaO	Estimated wt% CaCO3	Sed. rate (cm/kyr)	MAR carb (g/cm2/kyr)	MAR det (g/cm2/kyr)		Age (Ma)	SiO2	Fe2O3	SiO2/Fe2O3		Height (m)	Age (Ma)	Bulk carbonate d13C	Bulk carbonate d18O		Height (m)	Age (Ma)	TOC wt %	TOC MAR (g/cm2/kyr)		Height (m)	Measured CaCO3 wt%
	8.54	55.632	49.4	79.0127	2.66667	3.79261	1.00739		55.632	12.5	1.65	7.57576		8.54	55.632	0.964924	-3.11985		8.6	55.6297	0.317	0.0148911		8.34	87.5813
	8.44	55.6358	49.4	79.0127	2.66667	3.79261	1.00739		55.6358	12.5	1.65	7.57576		8.34	55.6395	1.07486	-3.02125		8.1	55.6489	0.292	0.0107966		7.49	78.769
	8.34	55.6395	50.5	80.7827	2.66667	3.87757	0.922429		55.6395	8.6	2.35	3.65957		8.14	55.647	0.880705	-2.889		7.6	55.6733	0.311	0.0100865		5.74	79.1399
	8.24	55.6433	49.2	78.6908	2.66667	3.77716	1.02284		55.6433	9.74	2.15	4.53023		7.94	55.6565	0.933491	-3.02343		7.1	55.701	0.274	0.0121432		5.44	74.8358
	8.14	55.647	35	55.8409	2.09524	2.106	1.66543		55.647	15.4	3.17	4.85804		7.79	55.6637	0.687129	-5.29994		6.6	55.7213	0.223	0.00993943		5.14	69.5151
	8.04	55.6518	40	63.8867	2.09524	2.40944	1.36199		55.6518	7.85	1.48	5.30405		7.69	55.6685	0.514114	-3.25449		6.1	55.7415	0.184	0.00492857		3.963	19.962
	7.94	55.6565	50.2	80.3	2.09524	3.02846	0.742972		55.6565	6.83	2.11	3.23697		7.59	55.6738	0.76363	-3.24837		5.6	55.7751	0.21	0.009		3.7595	9.12202
	7.84	55.6613	44.2	70.6451	2.1	2.67038	1.10962		55.6613	13.2	2.73	4.83516		7.49	55.679	0.856942	-3.1971		5.1	55.7961	0.141	0.00604286		3.4339	14.283
	7.84	55.6613	46.6	74.5071	2.09524	2.80998	0.961448		55.6613	9.33	2.61	3.57471		7.39	55.6843	0.65901	-2.83293		4.95	55.8024	0.134	0.00574286		3.1083	9.18729
	7.79	55.6637	28.4	45.2206	2.09524	1.70546	2.06597		55.6637	19	3.07	6.18893		7.29	55.6896	0.918171	-3.25655		4.8	55.8087	0.135	0.00578571		2.8641	4.71864
	7.74	55.6661	51	81.5873	2.05415	3.01667	0.680805		55.6661	7.88	1.48	5.32432		7.09	55.7016	0.825964	-3.13206		4.65	55.815	0.157	0.016409		2.5792	7.70816
	7.69	55.6685	23.5	37.3357	1.90476	1.28008	2.14849		55.6685	22.3	3.16	7.05696		6.99	55.7076	0.771435	-2.79308		4.5	55.8176	0.232	0.0242477		2.2943	10.5387
	7.64	55.6711	28.4	45.2206	1.90476	1.55042	1.87815		55.6711	23.1	3.43	6.73469		6.79	55.7152	0.884459	-3.24596		4.35	55.8202	0.21	0.0219484		1.7245	4.79656
	7.59	55.6738	30.9	49.2434	1.90476	1.68835	1.74022		55.6738	16.6	3.48	4.77011		6.59	55.7216	0.672815	-3.18689		4.2	55.8227	0.144	0.0150503		1.114	0.390449
	7.44	55.6816	48.3	77.2426	1.90476	2.64832	0.780253		55.6816	12	2.18	5.50459		6.43	55.7268	1.0606	-2.96172		4.05	55.8253	0.175	0.0182903		0.8698	0.316368
	7.39	55.6843	48.4	77.4035	1.90476	2.65384	0.774736		55.6843	10.5	1.97	5.32995		6.24	55.7341	0.901478	-3.40044		3.9	55.8279	0.221	0.0230981		0.25	53.4946
	7.34	55.6869	37.2	59.3811	1.85185	1.97937	1.35396		55.6869	21.4	3.61	5.92798		6.09	55.742	0.688168	-3.1932		3.75	55.8305	0.185	0.0126857		0	57.3404
	7.29	55.6896	35.2	56.1628	1.66667	1.68488	1.31512		55.6896	19.4	3.39	5.72271		5.99	55.7473	0.38976	-2.81198		3.6	55.8344	0.176	0.0120686		-0.74	69.3068
	7.19	55.6956	50.1	80.1391	1.66667	2.40417	0.595828		55.6956	8.74	2.33	3.75107		5.89	55.7528	0.408725	-3.26325		3.45	55.8384	0.228	0.0149236		-1.49	46.9023
	7.09	55.7016	38.7	61.7948	1.66667	1.85384	1.14616		55.7016	6.65	2.31	2.87879		5.79	55.7612	0.591483	-3.1721		3.3	55.8425	0.169	0.01014		-1.9	52.8113
	7.04	55.7046	48.8	78.0472	1.66667	2.34142	0.658585		55.7046	8.57	2.23	3.84305		5.69	55.7696	0.425988	-3.15515		3.15	55.847	0.166	0.00996		-2.34	51.328
	6.99	55.7076	41.9	66.9441	2.3	2.77148	1.36852		55.7076	13.6	2.66	5.11278		5.59	55.7755	0.462318	-3.08744		3	55.8515	0.292	0.0150171		-2.57	50.835
	6.99	55.7076	36.5	58.2547	2.30496	2.41695	1.73199		55.7076	12.4	2.81	4.41281		5.49	55.7797	0.702296	-3.32646		2.85	55.8568	0.257	0.0132171		-2.81	43.4407
	6.89	55.7119	35.2	56.1628	3.09524	3.12907	2.44236		55.7119	19.4	3.39	5.72271		5.39	55.7839	0.570528	-3.03414		2.7	55.862	0.612	0.03672		-3.54	60.0445
	6.79	55.7152	48.4	77.4035	3.09524	4.31248	1.25895		55.7152	7.11	2.16	3.29167		5.29	55.7881	0.0665454	-2.73361		2.55	55.8665	0.518	0.03108		-3.94	54.4321
	6.69	55.7184	47.5	75.9553	3.09524	4.23179	1.33963		55.7184	9.41	2.43	3.87243		5.19	55.7923	-0.296254	-3.03924		2.4	55.871	0.295	0.0210569
	6.59	55.7216	51.4	82.231	3.09524	4.58144	0.989989		55.7216	7.42	2.1	3.53333		5.09	55.7965	0.514991	-3.10026		2.25	55.8748	0.156	0.0123017
	6.49	55.7249	48.2	77.0817	3.09524	4.29455	1.27688		55.7249	8.07	1.47	5.4898		4.99	55.8007	0.496147	-3.23511		2.1	55.8782	0.196	0.015456
	6.43	55.7268	51.2	81.9091	3.09524	4.56351	1.00792		55.7268	9.15	1.24	7.37903		4.89	55.8049	0.469943	-3.33903		1.95	55.8816	0.24	0.0176353
	6.3	55.731	46.1	73.7025	1.90476	2.52694	0.901629		55.731	17.5	1.26	13.8889		4.79	55.8091	0.399085	-3.26108		1.8	55.8853	0.245	0.01722
	6.24	55.7341	47.8	76.438	1.90476	2.62073	0.807839		55.7341	8.24	1.7	4.84706		4.6956	55.8131	0.25315	-3.05547		1.65	55.8891	0.258	0.0181337
	6.14	55.7394	50.4	80.6218	1.90476	2.76418	0.664395		55.7394	9.25	1.76	5.25568		4.6142	55.8156	0.0406803	-3.16204		1.5	55.893	0.144	0.0115854
	6.09	55.742	51.2	81.9091	1.90476	2.80831	0.620258		55.742	21.5	2.34	9.18803		4.5328	55.817	-0.0327067	-3.36488		1.35	55.8963	0.314	0.0258377
	6.04	55.7447	46	73.5416	1.90476	2.52143	0.907146		55.7447	6.54	1.52	4.30263		4.4514	55.8184	-0.31607	-3.62547		1.2	55.8996	0.145	0.0119314
	5.99	55.7473	33.2	52.9445	1.90476	1.81524	1.61333		55.7473	15.4	3.4	4.52941		4.37	55.8198	-1.85728	-3.8048		1.05	55.9029	0.152	0.0116076
	5.94	55.7499	34.9	55.68	1.70068	1.70449	1.35673		55.7499	15.1	3.4	4.44118		4.2886	55.8212	-2.04717	-4.08318		0.9	55.9064	0.198	0.0145954
	5.89	55.7528	41.2	65.8177	1.19048	1.41038	0.732479		55.7528	7.53	2.33	3.23176		4.2072	55.8226	-2.36899	-4.18603		0.75	55.9101	0.107	0.00788743
	5.84	55.757	45	71.9324	1.19048	1.54141	0.601448		55.757	5.82	2.57	2.26459		4.1258	55.824	-1.96979	-4.42783		0.6	55.9138	0.123	0.00435744
	5.79	55.7612	48.2	77.0817	1.19048	1.65175	0.491107		55.7612	8.85	2.46	3.59756		4.0444	55.8254	-2.76345	-3.92216		0.45	55.9214	0.104	0.0032609
	5.74	55.7654	49.6	79.3345	1.19048	1.70002	0.442832		55.7654	7.88	2.6	3.03077		3.963	55.8268	-2.30454	-4.34411		0.3	55.93	0.111	0.00218882
	5.69	55.7696	37.8	60.3466	1.32275	1.43682	0.94413		55.7696	15.4	2.83	5.4417		3.8816	55.8282	-2.6968	-4.51948		0.15	55.9437	0.23	0.00453539
	5.64	55.7734	44.7	71.4497	2.38095	3.06213	1.22359		55.7734	15.6	3.24	4.81481		3.8002	55.8296	-3.09854	-3.95399		0	55.9574	0.138	0.00272124
	5.59	55.7755	47.3	75.6335	2.38095	3.24143	1.04428		55.7755	11.6	2.45	4.73469		3.7188	55.8313	-3.0379	-4.23208		-0.15	55.9711	0.311	0.00613264
	5.54	55.7776	47.4	75.7944	2.38095	3.24833	1.03738		55.7776	9.61	2.57	3.7393		3.6374	55.8335	-3.47767	-4.95046		-0.45	55.9985	0.256	0.00504809
	5.49	55.7797	45	71.9324	2.38095	3.08282	1.2029		55.7797	9.42	2.68	3.51493		3.556	55.8356	-2.33926	-4.43508		-0.75	56.0258	0.276	0.00544247
	5.44	55.7818	47.3	75.6335	2.38095	3.24143	1.04428		55.7818	10.5	2.51	4.18327		3.4746	55.8377	-2.44188	-4.37623		-1.05	56.0532	0.333	0.00656646
	5.39	55.7839	43.8	70.0014	2.38095	3.00006	1.28565		55.7839	12.6	2.42	5.20661		3.3932	55.8399	-4.27664	-4.32549		-1.35	56.0806	0.256	0.00504809
	5.34	55.786	36.4	58.0938	2.38095	2.48973	1.79598		55.786	17.6	3.81	4.61942		3.3118	55.8421	-2.32096	-4.2986		-1.65	56.108	0.143	0.00551571
	5.29	55.7881	48.2	77.0817	2.38095	3.3035	0.982213		55.7881	27.4	3.95	6.93671		3.2304	55.8446	-2.45407	-4.53232		-1.95	56.122	0.307	0.00947314
	5.24	55.7902	43.4	69.3578	2.38095	2.97248	1.31324		55.7902	14.2	3.16	4.49367		3.149	55.847	-3.9811	-4.62492		-2.25	56.1395	0.207	0.00665357
	5.19	55.7923	42.1	67.2659	2.38095	2.88282	1.40289		55.7923	15.1	3.21	4.70405		3.0676	55.8495	-4.58913	-4.21381		-2.55	56.1563	0.201	0.00861429
	5.14	55.7944	42.7	68.2314	2.38095	2.9242	1.36151		55.7944	14.2	3	4.73333		2.9862	55.852	-5.31587	-5.14063		-2.85	56.1689	0.201	0.00712906
	5.09	55.7965	38.8	61.9557	2.38	2.65418	1.62982		55.7965	17.7	3.88	4.56186		2.9048	55.8548	-5.23913	-5.16015		-3.15	56.1841	0.247	0.00896672
	5.09	55.7965	44.2	70.6451	2.38095	3.02765	1.25807		55.7965	14.4	2.97	4.84848		2.8234	55.8577	-3.83496	-4.56506		-3.45	56.199	0.203	0.00783
	5.04	55.7986	41	65.4958	2.38095	2.80696	1.47875		55.7986	14.3	2.69	5.31599		2.742	55.8605	-3.40065	-4.96361		-3.75	56.213	0.323	0.0124586
	4.99	55.8007	44.9	71.7715	2.38095	3.07592	1.20979		55.8007	12	2.65	4.5283		2.6606	55.8632	-4.82792	-5.80064		-4.05	56.227	0.105	0.00462857
	4.94	55.8028	46.6	74.5071	2.38095	3.19316	1.09255		55.8028	11.6	2.6	4.46154		2.5792	55.8656	-2.93165	-4.86552		-4.35	56.2392	0.187	0.00961714
	4.89	55.8049	48.8	78.0472	2.38095	3.34488	0.940835		55.8049	14.9	2.76	5.39855		2.4978	55.8681	-4.52045	-4.75482		-4.65	56.2497	0.31	0.0127543
	4.84	55.807	40.6	64.8522	2.38095	2.77938	1.50634		55.807	11.7	2.83	4.13428		2.4164	55.8705	-2.22627	-2.15616		-4.95	56.2629	0.284	0.0100729
	4.79	55.8091	52.6	84.1619	2.38095	3.60694	0.678774		55.8091	18.3	3.2	5.71875		2.335	55.8728	-2.80391	-1.74692		-5.25	56.2781	0.2	0.00857143
	4.74	55.8112	46.8	74.8289	2.38095	3.20695	1.07876		55.8112	15.7	3.26	4.81595		2.2536	55.8747	-2.00495	-2.01401		-5.55	56.2907	0.329	0.01645
	4.6956	55.8131	39.2	62.5994	2.38095	2.68283	1.60288		55.8131	14.2	3.34	4.2515		2.1722	55.8766	-2.96074	-3.48894		-5.85	56.3015	0.242	0.01452
	4.6549	55.8148	38.3	61.1511	4.9492	5.44768	3.46087		55.8148	16.7	3.45	4.84058		2.0908	55.8784	-2.63878	-4.08646		-6.15	56.3105	0.342	0.0199654
	4.6142	55.8156	37.8	60.3466	5.80645	6.30719	4.14442		55.8156	18.1	3.84	4.71354		2.0094	55.8803	-2.5342	-4.04794		-6.45	56.3197	0.28	0.0144
	4.5735	55.8163	30.8	49.0825	5.80645	5.12992	5.3217		55.8163	20	4.4	4.54545		1.928	55.8821	-3.78011	-4.11794		-6.75	56.3302	0.242	0.0112172
	4.5328	55.817	32.2	51.3353	5.80645	5.36537	5.08624		55.817	16.5	3.87	4.26357		1.8466	55.8841	-1.97477	-2.73728		-7.05	56.3419	0.203	0.0063
	4.4921	55.8177	37.9	60.5075	5.80645	6.32401	4.12761		55.8177	17.1	4.32	3.95833		1.7652	55.8862	-1.92299	-2.81119		-7.35	56.3593	0.268	6.29114e-05
	4.4514	55.8184	31.7	50.5308	5.80645	5.28128	5.17033		55.8184	19.1	4.73	4.03805		1.6838	55.8883	-2.37426	-2.88237
	4.4107	55.8191	27	42.9678	5.80645	4.49082	5.96079		55.8191	22	5.8	3.7931		1.6024	55.8904	-1.21538	-2.74636
	4.37	55.8198	14.1	22.2098	5.80645	2.32128	8.13033		55.8198	28	3.78	7.40741		1.521	55.8925	-3.18557	-3.04498
	4.3293	55.8205	10.3	16.095	5.80645	1.68219	8.76943		55.8205	32.3	3.91	8.26087		1.4396	55.8944	-2.12345	-1.90738
	4.2886	55.8212	12.4	19.4742	5.80645	2.03537	8.41624		55.8212	33.5	8.31	4.03129		1.3582	55.8962	-1.51364	-2.78029
	4.2479	55.8219	10.5	16.4168	5.80645	1.71582	8.73579		55.8219	27.2	8.36	3.25359		1.2768	55.8979	-1.45131	-3.39078
	4.2072	55.8226	11.2	17.5432	5.80645	1.83355	8.61806		55.8226	30.6	7.76	3.9433		1.1954	55.8997	-2.2881	-1.8712
	4.1665	55.8233	9.62	15.0008	5.80645	1.56782	8.88379		55.8233	26.2	7.76	3.37629		0.9512	55.9052	-4.26198	-3.12024
	4.1258	55.824	8.89	13.8261	5.80645	1.44505	9.00656		55.824	23.5	6.71	3.50224		0.8698	55.9072	-4.19096	-4.73253
	4.0851	55.8247	11.7	18.3478	5.80645	1.91764	8.53397		55.8247	20.7	7.38	2.80488		0.707	55.9112	-5.97637	-3.13891
	4.0444	55.8254	14.7	23.1752	5.80645	2.42219	8.02943		55.8254	26.7	7.8	3.42308		0.5442	55.916	-3.83574	-5.56426
	4.0037	55.8261	12.5	19.6351	5.80645	2.05219	8.39943		55.8261	20.2	7.43	2.71871		0.5035	55.9183	-4.25	-6.1
	3.963	55.8268	12.2	19.1524	5.80645	2.00173	8.44988		55.8268	26.3	6.98	3.76791		0.4628	55.9207	-3.30985	-5.04969
	3.9223	55.8275	9.23	14.3732	5.80645	1.50223	8.94938		55.8275	28.6	5.92	4.83108		0.3814	55.9253	-3.59206	-4.55783
	3.8816	55.8282	8.85	13.7617	5.80645	1.43832	9.01329		55.8282	31.2	4.86	6.41975		0.3407	55.9277	-0.8	-3.38
	3.8409	55.8289	6.73	10.3503	5.80645	1.08178	9.36984		55.8289	28.4	5.67	5.00882		0.3	55.93	-0.276663	-3.6122
	3.8002	55.8296	6.91	10.64	5.80645	1.11205	9.33956		55.8296	38.1	6.5	5.86154		0.25	55.9346	0.01	-3.52
	3.7595	55.8303	5.91	9.03084	4.14	0.672978	6.77902		55.8303	32.4	5.27	6.14801		0.2	55.9391	0.0935758	-3.47162
	3.7595	55.8303	4.36	6.53666	4.14203	0.48735	6.9683		55.8303	36.5	6.63	5.50528		0.15	55.9437	0.09	-3.36
	3.7188	55.8313	4.89	7.38951	3.80952	0.506709	6.35043		55.8313	31.7	6.86	4.62099		0.1	55.9483	0.0384268	-3.47258
	3.6781	55.8324	7.14	11.0101	3.80952	0.754978	6.10217		55.8324	24.6	5.4	4.55556		0.05	55.9528	0.43	-2.9
	3.6374	55.8335	6.79	10.4469	3.80952	0.716358	6.14078		55.8335	36.7	7.19	5.10431		0	55.9574	0.716049	-3.234
	3.5967	55.8345	6.95	10.7044	3.80952	0.734013	6.12313		55.8345	31.1	6.95	4.47482		-0.14	55.9702	1.44	-3.33
	3.556	55.8356	7.9	12.233	3.80952	0.838837	6.01831		55.8356	31.5	7.85	4.01274		-0.2	55.9756	1.17441	-3.12374
	3.5153	55.8367	7.88	12.2009	3.80952	0.83663	6.02051		55.8367	29.5	7.85	3.75796		-0.38	55.9921	1.46523	-3.03484
	3.4746	55.8377	7.67	11.8629	3.80952	0.813459	6.04368		55.8377	28.1	7.99	3.5169		-0.54	56.0067	1.36523	-3.14862
	3.4339	55.8388	9.02	14.0353	3.80952	0.96242	5.89472		55.8388	29.7	7.82	3.79795		-0.74	56.0249	1.07	-3.2
	3.3932	55.8399	6.15	9.41703	3.80952	0.645739	6.2114		55.8399	28	8.59	3.2596		-0.8	56.0304	0.448674	-3.57804
	3.3525	55.8409	6.96	10.7204	3.36	0.648372	5.39963		55.8409	30.4	7.54	4.03183		-0.89	56.0386	0.450843	-3.4307
	3.3525	55.8409	6.6	10.1412	3.35913	0.613177	5.43325		55.8409	28.5	8.38	3.40095		-0.94	56.0432	0.51	-3.26
	3.3118	55.8421	7.84	12.1365	3.33333	0.72819	5.27181		55.8421	28.1	8.05	3.49068		-0.99	56.0478	0.474762	-3.47986
	3.2711	55.8434	9.14	14.2284	3.33333	0.853703	5.1463		55.8434	23.2	7.95	2.91824		-1.02	56.0505	-0.11	-3.96
	3.2304	55.8446	9.4	14.6468	3.33333	0.878806	5.12119		55.8446	28.7	8.59	3.34109		-1.07	56.0551	0.475535	-3.61621
	3.1897	55.8458	6.46	9.91587	3.33333	0.594952	5.40505		55.8458	26.8	8.93	3.00112		-1.2	56.0669	-0.924332	-4.53551
	3.149	55.847	4.06	6.05392	3.33333	0.363235	5.63677		55.847	28.3	11.3	2.50442		-1.35	56.0806	0.517404	-3.88423
	3.1083	55.8483	6.04	9.24003	3.33333	0.554402	5.4456		55.8483	33.4	4.29	7.78555		-1.44	56.0888	0.876397	-3.42882
	3.0676	55.8495	3.12	4.54132	3.33333	0.272479	5.72752		55.8495	41.5	7.45	5.57047		-1.55	56.0989	0.621093	-3.9196
	3.0269	55.8507	5.12	7.75961	3.15504	0.440674	5.2384		55.8507	32.4	8.88	3.64865		-1.65	56.108	0.580153	-3.52887
	2.9862	55.852	6.47	9.93196	2.85714	0.510787	4.63207		55.852	40.9	4.46	9.1704		-1.75	56.1127	0.0983645	-3.91351
	2.9455	55.8534	11	17.2214	2.85714	0.885672	4.25719		55.8534	38.3	3.9	9.82051		-1.85	56.1173	1.1347	-3.54824
	2.9048	55.8548	9.51	14.8238	2.85714	0.762365	4.38049		55.8548	36.6	6.38	5.73668		-1.95	56.122	0.364191	-4.41817
	2.8641	55.8563	3.32	4.86315	2.85714	0.250105	4.89275		55.8563	39.1	5.66	6.90813		-2.05	56.1267	-0.148011	-3.88064
	2.8234	55.8577	6.01	9.19175	2.85714	0.472719	4.67014		55.8577	37.4	7.57	4.94055		-2.15	56.1325	0.160883	-4.79305
	2.7827	55.8591	4.11	6.13437	2.85714	0.315482	4.82738		55.8591	30.4	7.59	4.00527		-2.25	56.1395	1.08312	-3.3729
	2.742	55.8605	6.59	10.1251	2.85714	0.520717	4.62214		55.8605	39.1	7.74	5.05168		-2.34	56.1458	1.1033	-3.42176
	2.7013	55.862	2.82	4.05857	3.31568	0.242225	5.726		55.862	39.9	4.36	9.15138		-2.41	56.1504	-1.11311	-4.82546
	2.6606	55.8632	3.29	4.81487	3.33333	0.288892	5.71111		55.8632	40.2	3.89	10.3342		-2.52	56.155	-0.60372	-4.89658
	2.6199	55.8644	2.46	3.47928	3.33333	0.208757	5.79124		55.8644	32.9	4.21	7.81473		-2.62	56.1592	1.09427	-3.24319
	2.5792	55.8656	5.93	9.06302	3.33333	0.543781	5.45622		55.8656	38	7.02	5.41311		-2.71	56.163	1.14464	-3.18329
	2.5385	55.8668	5.55	8.45155	3.33333	0.507093	5.49291		55.8668	35.9	8.09	4.43758		-2.81	56.1672	0.863926	-3.57776
	2.4978	55.8681	7.01	10.8009	3.33333	0.648054	5.35195		55.8681	38	7.65	4.96732		-2.93	56.1726	1.14584	-3.47037
	2.4571	55.8693	4.94	7.46997	3.33333	0.448198	5.5518		55.8693	36.4	5.18	7.02703		-3.03	56.1778	0.484525	-4.00821
	2.4164	55.8705	4.32	6.47229	3.33333	0.388338	5.61166		55.8705	33.1	5.92	5.59122		-3.13	56.1831	1.23129	-3.45184
	2.3757	55.8717	3.75	5.55508	3.6555	0.365519	6.21438		55.8717	33.1	4.94	6.7004		-3.22	56.1878	0.815125	-3.66078
	2.335	55.8728	7.8	12.0721	4.38095	0.951973	6.93374		55.8728	34.6	6.24	5.54487		-3.34	56.1939	0.0301249	-4.87661
	2.2943	55.8738	6.93	10.6722	4.38095	0.841577	7.04414		55.8738	38.3	6.2	6.17742		-3.44	56.1985	0.923589	-3.43596
	2.2536	55.8747	4.96	7.50215	4.38095	0.591598	7.29412		55.8747	29.9	4.37	6.84211		-3.54	56.2032	1.39747	-3.26214
	2.2129	55.8756	5.61	8.54809	4.38095	0.674078	7.21164		55.8756	32.9	6.28	5.23885		-3.64	56.2079	1.05591	-3.47911
	2.1722	55.8766	5.84	8.9182	4.38095	0.703264	7.18245		55.8766	35.1	7.87	4.45997		-3.75	56.213	-0.697546	-5.04002
	2.1315	55.8775	6.05	9.25612	4.38095	0.729911	7.1558		55.8775	32.7	8.06	4.05707		-3.84	56.2172	0.539424	-3.7465
	2.0908	55.8784	7.62	11.7825	4.38095	0.929133	6.95658		55.8784	33.5	7.63	4.39056		-3.94	56.2219	0.896904	-3.56856
	2.0501	55.8793	6.38	9.78714	4.38095	0.771786	7.11393		55.8793	30.7	8.4	3.65476		-4.02	56.2256	0.288548	-4.52449
	2.0094	55.8803	6.56	10.0768	4.38095	0.794626	7.09109		55.8803	32.8	7.96	4.1206
	1.9687	55.8812	3.75	5.55508	4.38095	0.438058	7.44766		55.8812	33.1	4.94	6.7004
	1.928	55.8821	6.81	10.4791	4.34579	0.819718	7.00271		55.8821	39.8	4.52	8.80531
	1.8873	55.8831	5.12	7.75961	3.90476	0.54539	6.48318		55.8831	30.4	5.72	5.31469
	1.8466	55.8841	12.2	19.1524	3.90476	1.34614	5.68243		55.8841	31.9	5.25	6.07619
	1.8059	55.8852	7.02	10.817	3.90476	0.76028	6.26829		55.8852	35	5.6	6.25
	1.7652	55.8862	6.35	9.73886	3.90476	0.684503	6.34407		55.8862	33.6	7.43	4.52221
	1.7245	55.8872	3.24	4.73441	3.90476	0.332762	6.69581		55.8872	36	8.8	4.09091
	1.6838	55.8883	4.46	6.69757	3.90476	0.470744	6.55783		55.8883	41	7.8	5.25641
	1.6431	55.8893	3.96	5.893	3.90476	0.414194	6.61438		55.8893	32.9	7.3	4.50685
	1.6024	55.8904	7.68	11.879	3.90476	0.834926	6.19365		55.8904	34.8	5.27	6.60342
	1.5617	55.8914	1.91	2.59425	3.90476	0.182339	6.84623		55.8914	41.7	4.53	9.2053
	1.521	55.8925	3.73	5.5229	3.90476	0.388181	6.64039		55.8925	35.9	4.59	7.82135
	1.4803	55.8935	5.05	7.64697	4.56568	0.628446	7.58978		55.8935	38.8	4.5	8.62222
	1.4396	55.8944	2.63	3.75283	4.57143	0.308805	7.91977		55.8944	39.4	4.97	7.92757
	1.3989	55.8953	1.69	2.24024	4.57143	0.184339	8.04423		55.8953	38.4	3.88	9.89691
	1.3582	55.8962	3.18	4.63787	4.57143	0.38163	7.84694		55.8962	36.6	8.55	4.2807
	1.3175	55.8971	6.9	10.6239	4.57143	0.874195	7.35438		55.8971	34.6	7.67	4.51108
	1.2768	55.8979	5.46	8.30672	4.57143	0.683525	7.54505		55.8979	39.2	6.96	5.63218
	1.1954	55.8997	1.53	1.98277	4.57143	0.163154	8.06542		55.8997	37.6	5.9	6.37288
	1.1547	55.9006	1.19	1.43566	4.57143	0.118134	8.11044		55.9006	36.6	6.79	5.39028
	1.114	55.9015	0.63	0.534539	4.57143	0.0439849	8.18459		55.9015	37.4	6.5	5.75385
	1.0733	55.9024	0.58	0.454082	4.57143	0.0373644	8.19121		55.9024	24.2	5.19	4.66281
	1.0326	55.9033	0.699	0.64557	4.46803	0.0519197	7.99054		55.9033	37.6	5.83	6.4494
	0.9919	55.9042	0.841	0.874069	4.09524	0.0644314	7.307		55.9042	31.2	3.33	9.36937
	0.9512	55.9052	1.12	1.32302	4.09524	0.0975256	7.2739		55.9052	34	3.02	11.2583
	0.9105	55.9062	0.69	0.631088	4.09524	0.0465202	7.32491		55.9062	38.8	4.4	8.81818
	0.8698	55.9072	0.59	0.470173	4.09524	0.0346585	7.33677		55.9072	32.5	5.22	6.22605
	0.8291	55.9082	0.38	0.132252	4.09524	0.00974887	7.36168		55.9082	35.3	5.4	6.53704
	0.7884	55.9092	0.738	0.708327	4.09524	0.0522138	7.31921		55.9092	36.4	7.79	4.67266
	0.7477	55.9102	0.775	0.767865	4.09524	0.0566026	7.31483		55.9102	37.6	4.71	7.98301
	0.707	55.9112	1.61	2.1115	4.09524	0.155648	7.21578		55.9112	32.9	4.47	7.36018
	0.6663	55.9121	1.29	1.59658	4.09524	0.11769	7.25374		55.9121	33.4	4.88	6.84426
	0.6256	55.9131	0.754	0.734073	4.09524	0.0541117	7.31732		55.9131	44.2	5.45	8.11009
	0.5849	55.9141	1.33	1.66094	2.20602	0.0659534	3.90489		55.9141	34.8	4.29	8.11189
	0.5442	55.916	2.64	3.76893	1.74194	0.118174	3.01731		55.916	40.9	3.78	10.8201
	0.5035	55.9183	3.23	4.71832	1.74194	0.147942	2.98754		55.9183	38.6	4.28	9.01869
	0.4628	55.9207	1.01	1.14602	1.74194	0.0359331	3.09955		55.9207	31.6	4.92	6.42276
	0.4221	55.923	1.99	2.72298	1.74194	0.0853786	3.05011		55.923	38.6	4.19	9.21241
	0.3814	55.9253	4.78	7.2125	1.74194	0.226147	2.90934		55.9253	37.5	4.81	7.79626
	0.3407	55.9277	16.6	26.2326	1.74194	0.82252	2.31296		55.9277	28.4	4.5	6.31111
	0.3	55.93	27.7	44.0942	1.09551	0.869497	1.10241		55.93	25	7.62	3.28084
	0.25	55.9346	27.7	44.0942	1.09551	0.869497	1.10241		55.9346	18.9	5.42	3.48708
	0.2	55.9391	26.1	41.5195	1.09551	0.818728	1.15318		55.9391	21.2	4.96	4.27419
	0.15	55.9437	24.3	38.6231	1.09551	0.761612	1.2103		55.9437	23.6	4.96	4.75806
	0.1	55.9483	27.3	43.4505	1.09551	0.856805	1.11511		55.9483	20.6	4.88	4.22131
	0.05	55.9528	25	39.7495	1.09551	0.783824	1.18809		55.9528	22.4	5.55	4.03604
	0	55.9574	32.3	51.4962	1.09551	1.01546	0.95645		55.9574	17.3	5.67	3.05115
	-0.14	55.9702	45.9	73.3807	1.09551	1.447	0.52491		55.9702	12.3	4.71	2.61146
	-0.2	55.9756	41.2	65.8177	1.09551	1.29787	0.674045		55.9756	12.1	6.18	1.95793
	-0.24	55.9793	49.6	79.3345	1.09551	1.56441	0.407505		55.9793	9.32	3.38	2.7574
	-0.38	55.9921	53	84.8056	1.09551	1.67229	0.29962		55.9921	12	2.49	4.81928
	-0.43	55.9966	52.7	84.3229	1.09551	1.66277	0.309139		55.9966	12.7	1.89	6.71958
	-0.54	56.0067	52.7	84.3229	1.09551	1.66277	0.309139		56.0067	11.3	2.43	4.65021
	-0.74	56.0249	43.7	69.8405	1.09551	1.37719	0.594718		56.0249	17.7	2.6	6.80769
	-0.8	56.0304	25.7	40.8759	1.09551	0.806035	1.16587		56.0304	25.5	3.9	6.53846
	-0.84	56.0341	23.9	37.9794	1.09551	0.74892	1.22299		56.0341	26.2	2.83	9.25795
	-0.94	56.0432	24	38.1403	1.09551	0.752093	1.21982		56.0432	28.3	5.34	5.29963
	-0.99	56.0478	21.2	33.6347	1.09551	0.663246	1.30866		56.0478	26.8	5.69	4.71002
	-1.02	56.0505	20.9	33.152	1.09551	0.653727	1.31818		56.0505	29	3.64	7.96703
	-1.07	56.0551	22.7	36.0484	1.1	0.713759	1.26624		56.0551	25.8	4.31	5.98608
	-1.07	56.0551	25.9	41.1977	1.09551	0.812382	1.15953		56.0551	41.6	4.98	8.35341
	-1.12	56.0596	12.8	20.1179	1.09551	0.396706	1.5752		56.0596	33.4	4.73	7.06131
	-1.2	56.0669	17.7	28.0027	1.09551	0.552188	1.41972		56.0669	31.5	3.99	7.89474
	-1.25	56.0715	10.3	16.095	1.09551	0.317379	1.65453		56.0715	28.8	4.37	6.59039
	-1.35	56.0806	27.8	44.2551	1.1	0.876251	1.10375		56.0806	28.5	4.5	6.33333
	-1.35	56.0806	11.2	17.5432	1.09551	0.345937	1.62597		56.0806	22.8	2.96	7.7027
	-1.44	56.0888	29.8	47.4734	1.09551	0.936132	1.03578		56.0888	23.7	4.36	5.43578
	-1.49	56.0934	32.3	51.4962	1.09551	1.01546	0.95645		56.0934	21.1	4.31	4.89559
	-1.55	56.0989	28.5	45.3815	1.09551	0.894882	1.07703		56.0989	22	3.38	6.50888
	-1.6	56.1034	19.5	30.8992	1.09551	0.609304	1.36261		56.1034	24.9	4.26	5.84507
	-1.65	56.108	21.1	33.4738	2.14286	1.29113	2.56601		56.108	29.8	4.31	6.91415
	-1.7	56.1103	37.5	59.8638	2.14286	2.30903	1.54811		56.1103	20.7	2.14	9.6729
	-1.75	56.1127	18.7	29.6118	2.14286	1.14217	2.71497		56.1127	24.4	4.41	5.53288
	-1.8	56.115	30.4	48.4389	2.14286	1.86836	1.98879		56.115	21.3	3.66	5.81967
	-1.85	56.1173	35.2	56.1628	2.14286	2.16628	1.69086		56.1173	20.6	3.59	5.73816
	-1.9	56.1197	33.8	53.91	2.14286	2.07938	1.77776		56.1197	19.4	3.71	5.22911
	-1.95	56.122	29	46.1861	2.14286	1.78146	2.07568		56.122	21.1	2.24	9.41964
	-2	56.1243	25.7	40.8759	2.14286	1.57664	2.2805		56.1243	22.8	3.81	5.98425
	-2.05	56.1267	18.3	28.9682	2.14286	1.11734	2.7398		56.1267	31.1	4.36	7.13303
	-2.1	56.129	22.3	35.4048	1.42857	0.910408	1.66102		56.129	26.6	3.76	7.07447
	-2.15	56.1325	28.1	44.7378	1.42857	1.1504	1.42103		56.1325	26.5	2.4	11.0417
	-2.2	56.136	30.3	48.2779	1.42857	1.24143	1.33		56.136	21.4	4.05	5.28395
	-2.25	56.1395	33.5	53.4272	1.42857	1.37384	1.19759		56.1395	22.9	3.7	6.18919
	-2.28	56.1416	33.2	52.9445	1.42857	1.36143	1.21		56.1416	20.2	2.84	7.11268
	-2.34	56.1458	34.9	55.68	1.42857	1.43177	1.13966		56.1458	23.1	5.16	4.47674
	-2.37	56.1479	20.6	32.6692	1.5873	0.933406	1.92374		56.1479	26.9	4.53	5.93819
	-2.41	56.1504	24.8	39.4276	2.38095	1.68976	2.59596		56.1504	28	3.25	8.61538
	-2.46	56.1525	21.3	33.7956	2.38095	1.44838	2.83733		56.1525	27.7	4.1	6.7561
	-2.52	56.155	32.2	51.3353	2.38095	2.20009	2.08563		56.155	23	2.19	10.5023
	-2.57	56.1571	40.8	65.174	2.38095	2.79317	1.49254		56.1571	27.2	4.47	6.08501
	-2.62	56.1592	36.3	57.9328	2.38095	2.48284	1.80288		56.1592	17	4.85	3.50515
	-2.67	56.1613	40.5	64.6913	2.38095	2.77248	1.51323		56.1613	14.2	3.62	3.92265
	-2.71	56.163	38.7	61.7948	2.38095	2.64835	1.63737		56.163	17.9	2.91	6.1512
	-2.76	56.1651	35.2	56.1628	2.38095	2.40698	1.87874		56.1651	20.8	3	6.93333
	-2.88	56.1702	17.7	28.0027	2.07039	1.04358	2.68313		56.1702	28.6	6.26	4.56869
	-2.93	56.1726	30.1	47.9561	1.90476	1.64421	1.78436		56.1726	21.2	4.08	5.19608
	-2.98	56.1752	31.9	50.8526	1.90476	1.74352	1.68505		56.1752	18.8	3.36	5.59524
	-3.03	56.1778	26.2	41.6804	1.90476	1.42904	1.99953		56.1778	24.9	5.73	4.34555
	-3.08	56.1805	32.4	51.6572	1.90476	1.7711	1.65747		56.1805	21.1	4.67	4.5182
	-3.13	56.1831	33.1	52.7836	1.90476	1.80972	1.61885		56.1831	22.5	3.64	6.18132
	-3.17	56.1852	16.8	26.5545	1.90476	0.910439	2.51813		56.1852	32.6	6.05	5.38843
	-3.22	56.1878	21.9	34.7611	1.90476	1.19181	2.23676		56.1878	29	3.78	7.67196
	-3.28	56.191	19.1	30.2555	2.05714	1.12032	2.58254		56.191	21.2	3.8	5.57895
	-3.34	56.1939	26.3	41.8414	2.14286	1.61388	2.24326		56.1939	27.3	2.36	11.5678
	-3.39	56.1962	28.6	45.5424	2.14286	1.75664	2.10051		56.1962	22	2.09	10.5263
	-3.44	56.1985	33	52.6226	2.14286	2.02973	1.82741		56.1985	21	4.21	4.98812
	-3.49	56.2009	34.2	54.5536	2.14286	2.10421	1.75293		56.2009	19.8	3.44	5.75581
	-3.54	56.2032	34.6	55.1973	2.14286	2.12904	1.7281		56.2032	18.6	3.82	4.86911
	-3.59	56.2055	30.6	48.7607	2.14286	1.88077	1.97637		56.2055	21.5	3.56	6.03933
	-3.64	56.2079	27.9	44.416	2.14286	1.71319	2.14395		56.2079	25.9	3.86	6.70984
	-3.7	56.2107	26.8	42.6459	2.14286	1.64491	2.21223		56.2107	23	3.6	6.38889
	-3.8	56.2153	30.9	49.2434	2.14286	1.89939	1.95775		56.2153	22.9	3.93	5.82697
	-3.84	56.2172	28	44.5769	2.14	1.7171	2.1349		56.2172	25.1	4.63	5.42117
	-3.84	56.2172	26.4	42.0023	2.14286	1.62009	2.23706		56.2172	23.6	2.46	9.5935
	-3.89	56.2195	28.8	45.8642	2.14286	1.76905	2.08809		56.2195	17.5	3.68	4.75543
	-3.94	56.2219	36.8	58.7374	2.14286	2.26559	1.59156		56.2219	18.7	3.51	5.32764
	-3.99	56.2242	35.6	56.8064	2.14286	2.19111	1.66604		56.2242	20.7	3.49	5.93123
	-4.02	56.2256	30	47.7952	1.35995	1.16998	1.27792		56.2256	21.1	2.16	9.76852

## Sheet: Age model
Precession-cycle number with respect to PETM	Half-precession cycle number within the PETM	Zumaia depth (m)	Age (Ma) PETM onset at 55.93 Ma	Cycle ID
19		10.55	55.542	Precession cycle
18		10.05	55.563	Precession cycle
17		9.65	55.584	Precession cycle
16		9.25	55.605	Precession cycle
15		8.7	55.626	Precession cycle
14		8.14	55.647	Precession cycle
13		7.7	55.668	Precession cycle
12		7.3	55.689	Precession cycle
11		6.95	55.71	Precession cycle
10		6.3	55.731	Precession cycle
9		5.9	55.752	Precession cycle
8		5.65	55.773	Precession cycle
7		5.15	55.794	Precession cycle
6		4.65	55.815	Precession cycle
	9	3.75	55.8305	Half-Precession cycle
	8	3.35	55.841	Half-Precession cycle
	7	3	55.8515	Half-Precession cycle
	6	2.7	55.862	Half-Precession cycle
	5	2.35	55.8725	Half-Precession cycle
	4	1.89	55.883	Half-Precession cycle
	3	1.48	55.8935	Half-Precession cycle
	2	1	55.904	Half-Precession cycle
	1	0.57	55.9145	Half-Precession cycle
	0	0.3	55.93	Precession cycle
	-1
-1			55.94	Precession cycle
-2			55.961	Precession cycle
-3			55.982	Precession cycle
-4			56.003	Precession cycle
-5			56.024	Precession cycle
-6			56.045	Precession cycle
-7			56.066	Precession cycle
-8			56.087	Precession cycle
-9		-1.65	56.108	Precession cycle
-10		-2.1	56.129	Precession cycle
-11		-2.4	56.15	Precession cycle
-12		-2.9	56.171	Precession cycle
-13		-3.3	56.192	Precession cycle
-14		-3.75	56.213	Precession cycle
-15		-4.2	56.234	Precession cycle
-16		-4.8	56.255	Precession cycle
-17		-5.2	56.276	Precession cycle
-18		-5.7	56.297	Precession cycle
-19		-6.4	56.318	Precession cycle
-20		-7	56.339	Precession cycle
-21		-7.5	56.368	Precession cycle
-22		-8.1	56.389	Precession cycle
-23		-8.9	56.41	Precession cycle
-24		-9.6	56.431	Precession cycle
-25		-10.3	56.452	Precession cycle
-26		-10.9	56.473	Precession cycle
-27		-11.5	56.494	Precession cycle
